# Supplementary material
Source: PubMed Central journal article supplement (PMC4681410)
Supplement: NIHMS743320-supplement-Supplementary_material.pdf [file NIHMS743320-supplement-Supplementary_material.pdf]

## Supplementary material for ‘On random-effects meta-analysis’

BY D. ZENG AND D. Y. LIN

*Department of Biostatistics, CB #7420, University of North Carolina, Chapel Hill,  
 North Carolina 27599, U.S.A.*

dzeng@bios.unc.edu lin@bios.unc.edu

### EXISTENCE OF THE MAXIMUM LIKELIHOOD ESTIMATORS

We will show that with probability tending to 1, there exists a local maximizer of  $\sum_{k=1}^K l_k(\beta, \sigma^2, \eta_k)$  in the neighbourhood  $\mathcal{N}$ . The proof consists of four main steps.

*Step 1.* We use a Laplace approximation for the integral in  $l_k(\beta, \sigma^2, \eta_k)$ . For each choice of  $(\beta, \sigma^2, \eta_k)$  in  $\mathcal{N}$ , the Taylor series expansion at  $\xi = 0$  yields

$$\begin{aligned} & \mathcal{P}_{nk} \left\{ -\log f_k(\mathcal{O}; \beta + \xi_k, \eta_k) \right\} + \frac{n\xi_k^2}{2n_k\sigma^2} \\ &= \mathcal{P}_{nk} \left\{ -\log f_k(\mathcal{O}; \beta, \eta_k) \right\} + \mathcal{P}_{nk} \left\{ -\partial \log f_k(\mathcal{O}; \beta, \eta_k) / \partial \beta \right\} \xi_k \\ & \quad + \frac{1}{2} \left[ \mathcal{P}_{nk} \left\{ -\partial^2 \log f_k(\mathcal{O}; \beta + \tilde{\xi}_k, \eta_k) / \partial \beta^2 \right\} + \frac{n}{2n_k\sigma^2} \right] \xi_k^2 \end{aligned}$$

for some  $\tilde{\xi}_k$  between 0 and  $\xi_k$ . By Conditions 2 and 4,

$$\begin{aligned} & \mathcal{P}_{nk} \left\{ -\log f_k(\mathcal{O}; \beta + \xi_k, \eta_k) \right\} + \frac{n\xi_k^2}{2n_k\sigma^2} \\ & > \mathcal{P}_{nk} \left\{ -\log f_k(\mathcal{O}; \beta, \eta_k) \right\} + \mathcal{P}_{nk} \left\{ -\partial \log f_k(\mathcal{O}; \beta, \eta_k) / \partial \beta \right\} \xi_k + \frac{q_0}{8\sigma_M^2} \xi_k^2, \end{aligned}$$

where  $q_0$  is some positive constant. If  $|\xi_k| = (8\sigma_M^2/q_0) |\mathcal{P}_{nk} \{ -\partial \log f_k(\mathcal{O}; \beta, \eta_k) / \partial \beta \}|$ , then

$$\mathcal{P}_{nk} \left\{ -\log f_k(\mathcal{O}; \beta + \xi_k, \eta_k) \right\} + \frac{n\xi_k^2}{2n_k\sigma^2} > \mathcal{P}_{nk} \left\{ -\log f_k(\mathcal{O}; \beta, \eta_k) \right\}.$$

This implies that there exists a local minimizer,  $\hat{\xi}_k(\beta, \eta_k, \sigma^2)$ , which minimizes

$$\mathcal{P}_{nk} \left\{ -\log f_k(\mathcal{O}; \beta, \eta_k) \right\} + \mathcal{P}_{nk} \left\{ -\partial \log f_k(\mathcal{O}; \beta, \eta_k) / \partial \beta \right\} \xi_k$$

and satisfies

$$\left| \hat{\xi}_k(\beta, \eta_k, \sigma^2) \right| \leq \frac{4\sigma_M^2}{q_0} \left| \mathcal{P}_{nk} \left\{ -\partial \log f_k(\mathcal{O}; \beta, \eta_k) / \partial \beta \right\} \right|.$$

Since  $\log f_k(\mathcal{O}; \beta, \eta_k)$  and its derivative are uniformly Donsker,

$$\sup_{\beta, \eta_1, \dots, \eta_K} \left| (\mathcal{P}_{nk} - \mathcal{P}_k) \left\{ -\partial \log f_k(\mathcal{O}; \beta, \eta_k) / \partial \beta \right\} \right| = O_p(1)n^{-1/2},$$

where  $O_p(1)$  denotes some random variable that is bounded uniformly over  $k = 1, \dots, K$ . In addition,  $|\beta_{k0} - \beta_0| = O_p(n^{-1/2})$  and  $\mathcal{P}_k\{-\partial \log f_k(\mathcal{O}; \beta_{k0}, \eta_{k0})/\partial \beta\} = 0$ . Thus,

$$\begin{aligned} & |\mathcal{P}_k\{-\partial \log f_k(\mathcal{O}; \beta, \eta_k)/\partial \beta\}| \\ & \leq |\mathcal{P}_k\{-\partial \log f_k(\mathcal{O}; \beta_0, \eta_{k0})/\partial \beta\}| + O_p(1)\{|\beta - \beta_0| + \|\eta_k - \eta_{k0}\|\} \\ & \leq O_p(1)\{n^{-1/2} + M(Kn)^{-1/2} + \|\eta_k - \eta_{k0}\|\}. \end{aligned}$$

As a result,

$$|\hat{\xi}_k(\beta, \eta_k, \sigma^2)| \leq O_p(1)\{n^{-1/2} + M(Kn)^{-1/2}\}. \quad (\text{S1})$$

With the above bound for  $\hat{\xi}_k(\beta, \eta_k, \sigma^2)$ , we can apply the Laplace approximation to  $l_k(\beta, \sigma^2, \eta_k)$ . By Corollary 4.8 of Evans & Swartz (2000),

$$\begin{aligned} & \sup_{\substack{|\beta - \beta_0| \leq M(Kn)^{-1/2}, \\ \|\eta_k - \eta_{k0}\| \leq Mn^{-1/2}, \sigma^2 \in \mathcal{C}_3}} \left| l_k(\beta, \sigma^2, \eta_k) + \frac{1}{2} \log \sigma^2 \right. \\ & \quad \left. - \left( -\frac{1}{2} \log \left[ \frac{n_k}{n} \frac{\partial^2}{\partial \beta^2} \mathcal{P}_{nk} \{-\log f_k(\mathcal{O}; \beta + \hat{\xi}_k(\beta, \eta_k, \sigma^2), \eta_k)\} + \frac{1}{\sigma^2} \right] \right. \right. \\ & \quad \left. \left. + n_k \left[ \mathcal{P}_{nk} \{\log f_k(\mathcal{O}; \beta + \hat{\xi}_k(\beta, \eta_k, \sigma^2), \eta_k)\} - \frac{n \hat{\xi}_k^2(\beta, \eta_k, \sigma^2)}{2n_k \sigma^2} \right] \right) \right| \\ & \leq O_p(1) n^{-1/2}. \end{aligned}$$

It follows from (S1) and the Glivenko–Cantelli theorem that

$$\begin{aligned} & \left| \log \left[ \frac{n_k}{n} \frac{\partial^2}{\partial \beta^2} \mathcal{P}_{nk} \{-\log f_k(\mathcal{O}; \beta + \hat{\xi}_k(\beta, \eta_k, \sigma^2), \eta_k)\} + \frac{1}{\sigma^2} \right] \right. \\ & \quad \left. - \log \left[ p_k \frac{\partial^2}{\partial \beta^2} E_{0k} \{-\log f_k(\mathcal{O}; \beta_0, \eta_{k0})\} + \frac{1}{\sigma^2} \right] \right| \leq O_p(1) Mn^{-1/2}, \end{aligned}$$

where  $E_{0k}$  denotes the expectation under the density  $f_k(\cdot; \beta_0, \eta_{k0})$ . Thus,

$$\begin{aligned} & \sup_{\substack{|\beta - \beta_0| \leq M(Kn)^{-1/2}, \\ \sigma^2, \eta_1, \dots, \eta_K}} \left| l_k(\beta, \sigma^2, \eta_k) - B_k(\sigma^2) \right. \\ & \quad \left. + n_k \left[ \mathcal{P}_{nk} \{-\log f_k(\mathcal{O}; \beta + \hat{\xi}_k(\beta, \eta_k, \sigma^2), \eta_k)\} + \frac{n \hat{\xi}_k^2(\beta, \eta_k, \sigma^2)}{2n_k \sigma^2} \right] \right| \\ & \leq O_p(1) Mn^{-1/2}, \end{aligned}$$

where

$$B_k(\sigma^2) = -\frac{1}{2} \log \sigma^2 + \frac{1}{2} \log \left[ p_k \frac{\partial^2}{\partial \beta^2} E_{0k} \{-\log f_k(\mathcal{O}; \beta_0, \eta_{k0})\} + \frac{1}{\sigma^2} \right].$$

Equivalently,

$$\begin{aligned} & \sup_{\substack{|\beta - \beta_0| \leq M(Kn)^{-1/2}, \\ \sigma^2, \eta_1, \dots, \eta_K}} \left| l_k(\beta, \sigma^2, \eta_k) - B_k(\sigma^2) \right. \\ & \quad \left. - \max_{\xi_k} \left( n_k \left[ \mathcal{P}_{nk} \{ \log f_k(\mathcal{O}; \beta + \xi_k, \eta_k) \} - \frac{n\xi_k^2}{2n_k\sigma^2} \right] \right) \right| \\ & \leq O_p(1) (Mn^{-1/2} + \|\hat{\eta}_k - \eta_{k0}\|). \end{aligned} \quad (\text{S2})$$

*Step 2.* We show the existence of a local estimator for  $\eta_k$  for each  $(\beta, \sigma^2)$  in the neighbourhood  $\mathcal{N}$ . To this end, we examine the function  $\mathcal{P}_{nk} \{ \log f_k(\mathcal{O}; \beta + \xi_k, \eta_k) \} - n\xi_k^2/(2n_k\sigma^2)$ . It follows from Conditions 2 and 4 that this function has a negative-definite Hessian matrix at  $\xi_k = 0$  and  $\eta_k = \eta_{k0}$ . In addition, the Hessian matrix is continuous in a neighbourhood of  $\beta_0$ , and its eigenvalues are bounded away from zero uniformly for  $k = 1, \dots, K$ . Thus, it follows from Taylor series expansion that when  $|\xi_k| + \|\eta_k - \eta_{k0}\| < \epsilon_0$  for a small  $\epsilon_0$ ,

$$\begin{aligned} & \left[ \mathcal{P}_{nk} \{ \log f_k(\mathcal{O}; \beta + \xi_k, \eta_k) \} - \frac{n\xi_k^2}{2n_k\sigma^2} \right] - \mathcal{P}_{nk} \{ \log f_k(\mathcal{O}; \beta, \eta_{k0}) \} \\ & \leq O_p(1) \{ n^{-1/2} + M(Kn)^{-1/2} \} (|\xi_k| + \|\eta_k - \eta_{k0}\|) - c_0 (\xi_k^2 + \|\eta_k - \eta_{k0}\|^2) \\ & \leq O_p(1) \{ n^{-1/2} + M(Kn)^{-1/2} \} (|\xi_k| + \|\eta_k - \eta_{k0}\|) - c_0 \|\eta_k - \eta_{k0}\|^2 \end{aligned}$$

for some positive constant  $c_0$  independent of  $k$ . It then follows from (S1) that

$$\begin{aligned} & \max_{\xi_k} \left[ \mathcal{P}_{nk} \{ \log f_k(\mathcal{O}; \beta + \xi_k, \eta_k) \} - \frac{n\xi_k^2}{2n_k\sigma^2} \right] - \mathcal{P}_{nk} \{ \log f_k(\mathcal{O}; \beta, \eta_{k0}) \} \\ & = \left( \mathcal{P}_{nk} \left[ \log f_k \{ \mathcal{O}; \beta + \hat{\xi}_k(\beta, \sigma^2, \eta_k), \eta_k \} \right] - \frac{n\hat{\xi}_k^2(\beta, \sigma^2, \eta_k)}{2n_k\sigma^2} \right) - \mathcal{P}_{nk} \{ \log f_k(\mathcal{O}; \beta, \eta_{k0}) \} \\ & \leq O_p(1) \{ n^{-1/2} + M(Kn)^{-1/2} \} \{ n^{-1/2} + M(nK)^{-1/2} + \|\eta_k - \eta_{k0}\| \} - c_0 \|\eta_k - \eta_{k0}\|^2. \end{aligned}$$

In addition,

$$\begin{aligned} & \max_{\xi_k} \left[ \mathcal{P}_{nk} \{ \log f_k(\mathcal{O}; \beta + \xi_k, \eta_{k0}) \} - \frac{n\xi_k^2}{2n_k\sigma^2} \right] - \mathcal{P}_{nk} \{ \log f_k(\mathcal{O}; \beta, \eta_{k0}) \} \\ & = \left( \mathcal{P}_{nk} \left[ \log f_k \{ \mathcal{O}; \beta + \hat{\xi}_k(\beta, \sigma^2, \eta_{k0}), \eta_{k0} \} \right] - \frac{n\hat{\xi}_k^2(\beta, \sigma^2, \eta_{k0})}{2n_k\sigma^2} \right) - \mathcal{P}_{nk} \{ \log f_k(\mathcal{O}; \beta, \eta_{k0}) \} \\ & \geq -O_p(1) \{ n^{-1/2} + M(Kn)^{-1/2} \} \{ n^{-1/2} + M(nK)^{-1/2} \}. \end{aligned}$$

Thus, it follows from (S2) that

$$\begin{aligned} & n_k^{-1} l_k(\beta, \sigma^2, \eta_k) - n_k^{-1} l_k(\beta, \sigma^2, \eta_{k0}) \\ & \leq O_p(1) (Mn^{-3/2} + n^{-1} \|\eta_k - \eta_{k0}\|) \\ & \quad + O_p(1) \{ n^{-1/2} + M(Kn)^{-1/2} \} \{ n^{-1/2} + M(nK)^{-1/2} + \|\eta_k - \eta_{k0}\| \} \\ & \quad - c_0 \|\eta_k - \eta_{k0}\|^2. \end{aligned}$$

If  $\|\eta_k - \eta_{k0}\| = c_1 n^{-1/2}$  for some large constant  $c_1$ , then  $l_k(\beta, \sigma^2, \eta_k) < l_k(\beta, \sigma^2, \eta_{k0})$ ; that is, there exists a local maximizer, denoted by  $\hat{\eta}_k(\beta, \sigma^2)$ , which maximizes  $l_k(\beta, \sigma^2, \eta_k)$ , such

that

$$\sup_{k=1,\dots,K} \|\hat{\eta}_k(\beta, \sigma^2) - \eta_{k0}\| \leq O_p(1)n^{-1/2}.$$

Thus, we define a local profile loglikelihood function as  $\text{pl}_k(\beta, \sigma^2) = l_k\{\beta, \sigma^2, \hat{\eta}_k(\beta, \sigma^2)\}$ .

*Step 3.* We show that for each fixed  $\sigma^2$  there exists some local maximizer for the profile loglikelihood function for  $(\beta, \sigma^2)$ . In light of (S1) and (S2),

$$\begin{aligned} & \sup_{|\beta - \beta_0| \leq M(Kn)^{-1/2}, \sigma^2} \left| \text{pl}_k(\beta, \sigma^2) - B_k(\sigma^2) \right. \\ & \quad \left. - \max_{\substack{\|\eta_k - \eta_{k0}\| \leq O_p(1)n^{-1/2}, \\ |\xi_k| \leq O_p(1)Mn^{-1/2}}} n_k \left[ \mathcal{P}_{nk} \{ \log f_k(\mathcal{O}; \beta + \xi_k, \eta_k) \} - \frac{n\xi_k^2}{2n_k\sigma^2} \right] \right| \\ & \leq O_p(1) \frac{M}{n^{1/2}}. \end{aligned}$$

We obtain a quadratic expansion for the third term on the left-hand side. Specifically, define

$$S_{nk1} = \partial \mathcal{P}_{nk} \{ \log f_k(\mathcal{O}; \beta_{k0}, \eta_{k0}) \} / \partial \beta, \quad S_{nk2} = \partial \mathcal{P}_{nk} \{ \log f_k(\mathcal{O}; \beta_{k0}, \eta_{k0}) \} / \partial \eta_k,$$

where  $\beta_{k0} = \beta_0 + \xi_{k0}$  with  $\xi_{k0}$  being the true value of  $\xi_k$ , and let  $\mathcal{I}_k$  denote the information matrix of  $f_k(\mathcal{O}_{k1}; \beta_{k0}, \eta_{k0})$ . By Taylor series expansion,

$$\begin{aligned} & \mathcal{P}_{nk} \{ \log f_k(\mathcal{O}; \beta + \xi_k, \eta_k) \} - \frac{n\xi_k^2}{2n_k\sigma^2} \\ & = \mathcal{P}_{nk} \{ \log f_k(\mathcal{O}; \beta_{k0}, \eta_{k0}) \} + S_{nk1}(\beta + \xi_k - \beta_{k0}) + S_{nk2}(\eta_k - \eta_{k0}) \\ & \quad + \frac{1}{2}(\beta + \xi_k - \beta_{k0}, \eta_k - \eta_{k0}) \{ -\mathcal{I}_k + O_p(1)Mn^{-1/2} \} \begin{pmatrix} \beta + \xi_k - \beta_{k0} \\ \eta_k - \eta_{k0} \end{pmatrix} - \frac{n\xi_k^2}{2n_k\sigma^2} \end{aligned}$$

uniformly over  $k = 1, \dots, K$ . Thus,

$$\begin{aligned} & \sup_{|\beta - \beta_0| \leq M(Kn)^{-1/2}, \sigma^2} \left| \text{pl}_k(\beta, \sigma^2) - B_k(\sigma^2) \right. \\ & \quad \left. - \max_{\substack{\|\eta_k - \eta_{k0}\| \leq O_p(1)n^{-1/2}, \\ |\xi_k| \leq O_p(1)Mn^{-1/2}}} \left[ n_k \mathcal{P}_{nk} \{ \log f_k(\mathcal{O}; \beta_0, \eta_{k0}) \} \right. \right. \\ & \quad \left. \left. + n_k \left\{ S_{nk1}(\beta + \xi_k - \beta_{k0}) + S_{nk2}(\eta_k - \eta_{k0}) \right. \right. \right. \\ & \quad \left. \left. - \frac{1}{2}(\beta + \xi_k - \beta_{k0}, \eta_k - \eta_{k0}) \mathcal{I}_k \begin{pmatrix} \beta + \xi_k - \beta_{k0} \\ \eta_k - \eta_{k0} \end{pmatrix} - \frac{\xi_k^2}{2p_k\sigma^2} \right\} \right] \right| \\ & \leq O_p(1)M^3n^{-1/2}. \end{aligned}$$

When  $n$  is large enough, the third term on the left-hand side is the global maximum

$$C_{nk} - \frac{n_k}{2} \frac{\{\beta - \beta_{k0} - v_k(\mathcal{P}_{nk} - \mathcal{P}_k)(S_k^*)\}^2}{v_k + p_k\sigma^2},$$

where  $C_{nk}$  is independent of  $\beta$  and  $\sigma^2$ , and  $S_k^*$  is the efficient score function for  $\beta_{k0}$  based on  $\mathcal{O}_{k1}$ . Thus,

$$\begin{aligned} \sup_{|\beta - \beta_0| \leq M(Kn)^{-1/2}, \sigma^2} & \left| \sum_{k=1}^K \text{pl}_k(\beta, \sigma^2) - \sum_{k=1}^K C_{nk} - \sum_{k=1}^K B_k(\sigma^2) \right. \\ & \left. + \sum_{k=1}^K \frac{n_k}{2} \frac{\{\beta - \beta_{k0} - v_k(\mathcal{P}_{nk} - \mathcal{P}_k)(S_k^*)\}^2}{v_k + p_k \sigma^2} \right| \\ & \leq O_p(1) M^3 K n^{-1/2}. \end{aligned} \quad (\text{S3})$$

For each  $\sigma^2$ , the value of  $\beta$  that maximizes

$$g_n(\beta, \sigma^2) = - \sum_{k=1}^K \frac{n_k}{2} \frac{\{\beta - \beta_{k0} - v_k(\mathcal{P}_{nk} - \mathcal{P}_k)(S_k^*)\}^2}{v_k + p_k \sigma^2}$$

is equal to

$$\check{\beta} = \beta_0 + \left( \sum_{k=1}^K \frac{n_k}{v_k + p_k \sigma^2} \right)^{-1} \left[ \sum_{k=1}^K \frac{n_k}{v_k + p_k \sigma^2} \{\xi_{k0} + v_k(\mathcal{P}_{nk} - \mathcal{P}_k)(S_k^*)\} \right].$$

Its variance is of the order of  $(Kn)^{-1}$ , such that  $|\check{\beta} - \beta_0| \leq M(Kn)^{-1/2}/2$  for large  $M$  and  $n$ . We consider  $\beta = \check{\beta} \pm \epsilon(Kn)^{-1/2}$  for any small  $\epsilon$ . By (S3) and Condition 5,

$$\begin{aligned} \sum_{k=1}^K \text{pl}_k(\check{\beta}, \sigma^2) - \sum_{k=1}^K \text{pl}_k(\beta, \sigma^2) & \geq -O_p(1) M^3 K n^{-1/2} + g_n(\check{\beta}, \sigma^2) - g_n(\beta, \sigma^2) \\ & \geq -O_p(1) M^3 K n^{-1/2} + c_2 n K (\beta - \check{\beta})^2 \\ & \geq -O_p(1) M^3 K n^{-1/2} + c_2 \epsilon, \end{aligned}$$

where  $c_2$  is a positive constant. Thus,  $\sum_{k=1}^K \text{pl}_k(\check{\beta}, \sigma^2) - \sum_{k=1}^K \text{pl}_k(\beta, \sigma^2) > 0$  when  $n$  is large. This implies that there exists a local maximizer  $\hat{\beta}_{\text{ML}}(\sigma^2)$  for  $\sum_{k=1}^K \text{pl}_k(\beta, \sigma^2)$ , and

$$\begin{aligned} \hat{\beta}_{\text{ML}}(\sigma^2) & = \beta_0 + \left( \sum_{k=1}^K \frac{n_k}{v_k + p_k \sigma^2} \right)^{-1} \left[ \sum_{k=1}^K \frac{n_k}{v_k + p_k \sigma^2} \{\xi_{k0} + v_k(\mathcal{P}_{nk} - \mathcal{P}_k)(S_k^*)\} \right] \\ & + \frac{o_p(1)}{(Kn)^{1/2}}. \end{aligned} \quad (\text{S4})$$

*Step 4.* We define our estimator for  $\sigma^2$ , denoted by  $\hat{\sigma}_{\text{ML}}^2$ , as the argument maximizing  $\sum_{k=1}^K \text{pl}_k\{\hat{\beta}_{\text{ML}}(\sigma^2), \sigma^2\}$ . Then the estimator for  $\beta$  is given by  $\hat{\beta}_{\text{ML}}(\hat{\sigma}_{\text{ML}}^2)$ , and the estimator for  $\eta_k$  is  $\hat{\eta}_k(\hat{\beta}_{\text{ML}}, \hat{\sigma}_{\text{ML}}^2)$ . From Step 3, it is clear that

$$\sup_{\sigma^2} \left| \sum_{k=1}^K \text{pl}_k\{\hat{\beta}_{\text{ML}}(\sigma^2), \sigma^2\} - \sum_{k=1}^K C_{nk} - Q_n(\sigma^2) \right| \leq O_p(1) K n^{-1/2},$$

where

$$\begin{aligned}
 Q_n(\sigma^2) = & -\frac{1}{2} \sum_{k=1}^K \log(p_k \sigma^2 \mathcal{I}_{\beta_k} + 1) - \frac{1}{2} \sum_{k=1}^K \frac{n_k \{\xi_{k0} + v_k(\mathcal{P}_{nk} - \mathcal{P}_k)(S_k^*)\}^2}{v_k + p_k \sigma^2} \\
 & + \frac{1}{2} \left( \sum_{k=1}^K \frac{n_k}{v_k + p_k \sigma^2} \right)^{-1} \left[ \sum_{k=1}^K \frac{n_k \{\xi_{k0} + v_k(\mathcal{P}_{nk} - \mathcal{P}_k)(S_k^*)\}}{v_k + p_k \sigma^2} \right]^2. \quad (\text{S5})
 \end{aligned}$$

#### REFERENCES

- EVANS, M. & SWARTZ, T. (2000). *Approximating Integrals via Monte Carlo and Deterministic Methods*. Oxford: Oxford University Press.
- VAN DER VAART, A. W. & WELLNER, J. A. (1996). *Weak Convergence and Empirical Processes*. New York: Springer.

#### ADDITIONAL SIMULATION RESULTS

Additional simulation results not shown in the main article are reported in Tables S1–S3.

Table S1. *Values of  $I^2$  (%) in the simulation studies*

| $\tau^2$ | Number of studies, $K$ |    |    |    |    |    |    |    |    |    |
|----------|------------------------|----|----|----|----|----|----|----|----|----|
|          | 5                      | 10 | 15 | 20 | 25 | 30 | 35 | 40 | 45 | 50 |
| 0.00     | 0                      | 0  | 0  | 0  | 0  | 0  | 0  | 0  | 0  | 0  |
| 0.01     | 12                     | 13 | 14 | 14 | 14 | 14 | 15 | 15 | 15 | 15 |
| 0.02     | 22                     | 23 | 24 | 25 | 25 | 25 | 25 | 26 | 26 | 26 |
| 0.03     | 29                     | 31 | 33 | 33 | 33 | 34 | 34 | 34 | 34 | 34 |
| 0.04     | 35                     | 38 | 39 | 40 | 40 | 40 | 41 | 41 | 41 | 41 |
| 0.05     | 40                     | 43 | 45 | 45 | 46 | 46 | 46 | 46 | 46 | 46 |
| 0.06     | 45                     | 48 | 49 | 50 | 50 | 50 | 51 | 51 | 51 | 51 |
| 0.07     | 49                     | 52 | 53 | 54 | 54 | 54 | 55 | 55 | 55 | 55 |
| 0.08     | 52                     | 55 | 56 | 57 | 57 | 58 | 58 | 58 | 58 | 58 |
| 0.09     | 55                     | 58 | 59 | 60 | 60 | 60 | 61 | 61 | 61 | 61 |
| 0.10     | 57                     | 61 | 62 | 62 | 63 | 63 | 63 | 63 | 63 | 63 |

Table S2. Coverage probabilities (%) of 95% confidence intervals based on the new resampling method, compared with those of three other methods

| $\tau^2$ |     | Number of studies, $K$ |      |      |      |      |      |      |      |      |      |
|----------|-----|------------------------|------|------|------|------|------|------|------|------|------|
|          |     | 5                      | 10   | 15   | 20   | 25   | 30   | 35   | 40   | 45   | 50   |
| 0-00     | New | 98.9                   | 98.5 | 98.2 | 98.1 | 97.8 | 97.7 | 97.5 | 97.5 | 97.6 | 97.2 |
|          | DL  | 96.4                   | 96.0 | 96.2 | 96.1 | 96.2 | 96.1 | 95.8 | 96.2 | 96.3 | 96.0 |
|          | JB  | 99.4                   | 99.0 | 98.8 | 98.6 | 98.5 | 98.3 | 98.2 | 98.0 | 98.3 | 97.7 |
|          | HT  | 97.4                   | 96.8 | 96.6 | 96.3 | 96.3 | 96.3 | 96.1 | 96.2 | 96.3 | 96.0 |
| 0-01     | New | 97.9                   | 96.8 | 96.5 | 96.2 | 95.9 | 95.8 | 95.6 | 95.4 | 95.6 | 95.1 |
|          | DL  | 94.2                   | 93.6 | 94.0 | 94.0 | 94.1 | 94.2 | 93.9 | 93.9 | 94.4 | 93.9 |
|          | JB  | 99.1                   | 98.2 | 97.9 | 97.7 | 97.6 | 97.4 | 97   | 96.9 | 97.3 | 96.8 |
|          | HT  | 96.1                   | 95.0 | 95.0 | 95.0 | 94.7 | 94.7 | 94.7 | 94.7 | 95.0 | 94.6 |
| 0-02     | New | 96.9                   | 95.5 | 95.1 | 95.0 | 94.9 | 94.5 | 94.4 | 94.3 | 94.7 | 94.3 |
|          | DL  | 92.4                   | 92.4 | 92.5 | 92.8 | 93.0 | 93.3 | 93.0 | 93.2 | 93.8 | 93.4 |
|          | JB  | 98.8                   | 97.6 | 97.4 | 97.3 | 97.3 | 97.1 | 96.7 | 96.7 | 97.1 | 96.8 |
|          | HT  | 95.1                   | 94.0 | 94.0 | 94.2 | 94.3 | 94.3 | 94.0 | 94.3 | 94.5 | 94.4 |
| 0-03     | New | 96.0                   | 94.6 | 94.3 | 94.2 | 94.1 | 93.9 | 93.8 | 93.9 | 94.3 | 94.0 |
|          | DL  | 90.9                   | 91.4 | 91.7 | 92.3 | 92.6 | 93.0 | 92.6 | 93.0 | 93.6 | 93.5 |
|          | JB  | 98.4                   | 97.3 | 97.1 | 96.9 | 97.3 | 97.0 | 96.8 | 96.9 | 97.3 | 96.9 |
|          | HT  | 94.2                   | 93.3 | 93.5 | 93.7 | 94.0 | 94.0 | 93.8 | 94.0 | 94.4 | 94.3 |
| 0-04     | New | 95.3                   | 93.9 | 93.7 | 93.7 | 93.7 | 93.7 | 93.7 | 93.7 | 94.2 | 94.1 |
|          | DL  | 89.8                   | 90.7 | 91.4 | 92.0 | 92.7 | 92.8 | 92.7 | 93.3 | 93.6 | 93.7 |
|          | JB  | 98.1                   | 97.0 | 96.8 | 97.1 | 97.4 | 97.2 | 97.1 | 97.1 | 97.6 | 97.3 |
|          | HT  | 93.5                   | 92.7 | 93.3 | 93.5 | 93.8 | 93.8 | 93.7 | 94.0 | 94.2 | 94.3 |
| 0-05     | New | 94.6                   | 93.4 | 93.1 | 93.3 | 93.5 | 93.6 | 93.6 | 93.8 | 94.1 | 94.1 |
|          | DL  | 89.2                   | 90.3 | 91.4 | 92.1 | 92.7 | 92.9 | 93.0 | 93.3 | 93.7 | 93.8 |
|          | JB  | 97.8                   | 96.9 | 96.9 | 97.1 | 97.5 | 97.3 | 97.3 | 97.3 | 97.8 | 97.5 |
|          | HT  | 93.1                   | 92.5 | 93.0 | 93.5 | 93.9 | 93.9 | 93.7 | 94.0 | 94.3 | 94.4 |
| 0-06     | New | 94.0                   | 93.0 | 92.8 | 93.2 | 93.5 | 93.5 | 93.6 | 93.8 | 94.2 | 94.1 |
|          | DL  | 88.7                   | 90.1 | 91.2 | 92.0 | 92.8 | 93.1 | 93.1 | 93.4 | 93.8 | 93.9 |
|          | JB  | 97.7                   | 96.8 | 97   | 97.2 | 97.6 | 97.5 | 97.6 | 97.6 | 98.1 | 97.8 |
|          | HT  | 92.6                   | 92.2 | 92.9 | 93.3 | 93.8 | 93.9 | 93.9 | 94.0 | 94.3 | 94.4 |
| 0-07     | New | 93.4                   | 92.6 | 92.6 | 93.1 | 93.5 | 93.6 | 93.6 | 93.8 | 94.2 | 94.2 |
|          | DL  | 88.4                   | 89.9 | 91.1 | 92.1 | 92.8 | 93.2 | 93.1 | 93.5 | 93.9 | 93.9 |
|          | JB  | 97.4                   | 96.6 | 97.0 | 97.3 | 97.8 | 97.6 | 97.8 | 97.8 | 98.3 | 97.9 |
|          | HT  | 92.2                   | 92.1 | 92.9 | 93.4 | 93.8 | 93.9 | 94.0 | 94.0 | 94.4 | 94.4 |
| 0-08     | New | 92.8                   | 92.3 | 92.5 | 93.0 | 93.6 | 93.7 | 93.6 | 93.9 | 94.2 | 94.2 |
|          | DL  | 88.0                   | 89.7 | 91.1 | 92.2 | 92.9 | 93.3 | 93.2 | 93.6 | 94.0 | 94.0 |
|          | JB  | 97.3                   | 96.6 | 97.0 | 97.4 | 97.9 | 97.9 | 97.9 | 97.9 | 98.3 | 98.1 |
|          | HT  | 91.8                   | 92.0 | 92.9 | 93.4 | 93.8 | 94.0 | 93.9 | 94.1 | 94.4 | 94.4 |
| 0-09     | New | 92.4                   | 92.0 | 92.5 | 93.0 | 93.6 | 93.7 | 93.6 | 93.8 | 94.3 | 94.1 |
|          | DL  | 87.9                   | 89.8 | 91.1 | 92.2 | 93.0 | 93.3 | 93.3 | 93.6 | 94.1 | 94.0 |
|          | JB  | 97.1                   | 96.6 | 97.1 | 97.6 | 98.0 | 98.0 | 98.1 | 98.0 | 98.4 | 98.2 |
|          | HT  | 91.6                   | 92.0 | 93.0 | 93.4 | 93.7 | 94.0 | 94.0 | 94.1 | 94.5 | 94.5 |
| 0-10     | New | 92.0                   | 91.7 | 92.5 | 93.0 | 93.5 | 93.7 | 93.6 | 93.8 | 94.3 | 94.1 |
|          | DL  | 87.6                   | 89.8 | 91.2 | 92.3 | 93.0 | 93.4 | 93.3 | 93.6 | 94.1 | 94.0 |
|          | JB  | 96.9                   | 96.6 | 97.2 | 97.7 | 98.0 | 98.1 | 98.2 | 98.1 | 98.6 | 98.2 |
|          | HT  | 91.4                   | 91.9 | 93.0 | 93.5 | 93.7 | 94.0 | 94.0 | 94.1 | 94.5 | 94.5 |

New, the new resampling method proposed in this paper; DL, the DerSimonian–Laird method; JB, the Jackson–Bowden method; HT, the Hardy–Thompson method.

Table S3. Mean widths of 95% confidence intervals based on the new resampling method, compared with those of three other methods

| $\tau^2$ |     | Number of studies, $K$ |       |       |       |       |       |       |       |       |       |
|----------|-----|------------------------|-------|-------|-------|-------|-------|-------|-------|-------|-------|
|          |     | 5                      | 10    | 15    | 20    | 25    | 30    | 35    | 40    | 45    | 50    |
| 0-00     | New | 0.666                  | 0.406 | 0.312 | 0.26  | 0.227 | 0.204 | 0.186 | 0.172 | 0.161 | 0.151 |
|          | DL  | 0.553                  | 0.354 | 0.278 | 0.235 | 0.207 | 0.188 | 0.172 | 0.16  | 0.15  | 0.142 |
|          | JB  | 0.883                  | 0.493 | 0.367 | 0.3   | 0.258 | 0.229 | 0.206 | 0.189 | 0.175 | 0.164 |
|          | HT  | 0.618                  | 0.375 | 0.288 | 0.241 | 0.211 | 0.19  | 0.173 | 0.161 | 0.15  | 0.142 |
| 0-01     | New | 0.684                  | 0.421 | 0.326 | 0.273 | 0.239 | 0.215 | 0.197 | 0.182 | 0.171 | 0.161 |
|          | DL  | 0.575                  | 0.374 | 0.296 | 0.252 | 0.223 | 0.203 | 0.187 | 0.174 | 0.163 | 0.154 |
|          | JB  | 0.927                  | 0.528 | 0.398 | 0.328 | 0.284 | 0.253 | 0.229 | 0.211 | 0.196 | 0.184 |
|          | HT  | 0.646                  | 0.401 | 0.312 | 0.263 | 0.231 | 0.209 | 0.192 | 0.178 | 0.167 | 0.158 |
| 0-02     | New | 0.703                  | 0.437 | 0.341 | 0.287 | 0.253 | 0.229 | 0.21  | 0.195 | 0.183 | 0.173 |
|          | DL  | 0.598                  | 0.394 | 0.315 | 0.27  | 0.24  | 0.219 | 0.202 | 0.189 | 0.178 | 0.168 |
|          | JB  | 0.97                   | 0.563 | 0.429 | 0.357 | 0.31  | 0.278 | 0.253 | 0.234 | 0.218 | 0.205 |
|          | HT  | 0.672                  | 0.425 | 0.334 | 0.283 | 0.25  | 0.227 | 0.209 | 0.194 | 0.183 | 0.173 |
| 0-03     | New | 0.722                  | 0.455 | 0.357 | 0.302 | 0.267 | 0.242 | 0.223 | 0.208 | 0.195 | 0.185 |
|          | DL  | 0.62                   | 0.415 | 0.334 | 0.288 | 0.257 | 0.235 | 0.217 | 0.203 | 0.191 | 0.182 |
|          | JB  | 1.012                  | 0.597 | 0.459 | 0.384 | 0.336 | 0.302 | 0.276 | 0.255 | 0.239 | 0.225 |
|          | HT  | 0.697                  | 0.447 | 0.354 | 0.301 | 0.267 | 0.243 | 0.224 | 0.209 | 0.196 | 0.186 |
| 0-04     | New | 0.74                   | 0.472 | 0.372 | 0.317 | 0.281 | 0.255 | 0.235 | 0.22  | 0.207 | 0.196 |
|          | DL  | 0.641                  | 0.435 | 0.352 | 0.304 | 0.272 | 0.249 | 0.231 | 0.216 | 0.204 | 0.193 |
|          | JB  | 1.052                  | 0.629 | 0.487 | 0.41  | 0.36  | 0.324 | 0.297 | 0.275 | 0.257 | 0.243 |
|          | HT  | 0.722                  | 0.468 | 0.373 | 0.318 | 0.283 | 0.257 | 0.238 | 0.222 | 0.209 | 0.198 |
| 0-05     | New | 0.759                  | 0.488 | 0.388 | 0.331 | 0.294 | 0.268 | 0.247 | 0.231 | 0.218 | 0.206 |
|          | DL  | 0.662                  | 0.454 | 0.369 | 0.32  | 0.287 | 0.262 | 0.243 | 0.228 | 0.215 | 0.204 |
|          | JB  | 1.091                  | 0.66  | 0.515 | 0.435 | 0.382 | 0.345 | 0.316 | 0.294 | 0.275 | 0.259 |
|          | HT  | 0.745                  | 0.488 | 0.391 | 0.334 | 0.297 | 0.271 | 0.25  | 0.233 | 0.22  | 0.208 |
| 0-06     | New | 0.777                  | 0.505 | 0.402 | 0.345 | 0.307 | 0.28  | 0.259 | 0.242 | 0.228 | 0.216 |
|          | DL  | 0.683                  | 0.472 | 0.385 | 0.335 | 0.3   | 0.275 | 0.255 | 0.239 | 0.225 | 0.214 |
|          | JB  | 1.128                  | 0.69  | 0.541 | 0.458 | 0.404 | 0.365 | 0.335 | 0.311 | 0.291 | 0.275 |
|          | HT  | 0.767                  | 0.507 | 0.407 | 0.349 | 0.311 | 0.283 | 0.262 | 0.244 | 0.23  | 0.218 |
| 0-07     | New | 0.795                  | 0.521 | 0.417 | 0.358 | 0.319 | 0.291 | 0.269 | 0.252 | 0.237 | 0.225 |
|          | DL  | 0.703                  | 0.489 | 0.401 | 0.349 | 0.313 | 0.287 | 0.266 | 0.249 | 0.235 | 0.223 |
|          | JB  | 1.164                  | 0.718 | 0.565 | 0.48  | 0.424 | 0.383 | 0.352 | 0.327 | 0.307 | 0.289 |
|          | MLE | 0.619                  | 0.454 | 0.381 | 0.335 | 0.303 | 0.28  | 0.261 | 0.245 | 0.231 | 0.22  |
|          | HT  | 0.789                  | 0.525 | 0.423 | 0.363 | 0.323 | 0.295 | 0.273 | 0.254 | 0.24  | 0.227 |
| 0-08     | New | 0.813                  | 0.536 | 0.43  | 0.371 | 0.33  | 0.302 | 0.279 | 0.261 | 0.246 | 0.233 |
|          | DL  | 0.722                  | 0.506 | 0.415 | 0.362 | 0.325 | 0.297 | 0.276 | 0.258 | 0.244 | 0.231 |
|          | JB  | 1.199                  | 0.746 | 0.589 | 0.502 | 0.443 | 0.401 | 0.368 | 0.343 | 0.321 | 0.303 |
|          | HT  | 0.81                   | 0.542 | 0.438 | 0.376 | 0.335 | 0.306 | 0.283 | 0.264 | 0.248 | 0.235 |
| 0-09     | New | 0.83                   | 0.551 | 0.444 | 0.383 | 0.341 | 0.312 | 0.289 | 0.27  | 0.254 | 0.241 |
|          | DL  | 0.741                  | 0.522 | 0.429 | 0.374 | 0.336 | 0.308 | 0.286 | 0.267 | 0.252 | 0.239 |
|          | JB  | 1.232                  | 0.772 | 0.612 | 0.522 | 0.461 | 0.418 | 0.384 | 0.357 | 0.335 | 0.316 |
|          | HT  | 0.831                  | 0.559 | 0.452 | 0.388 | 0.346 | 0.316 | 0.292 | 0.273 | 0.257 | 0.243 |
| 0-10     | New | 0.847                  | 0.566 | 0.457 | 0.394 | 0.352 | 0.321 | 0.298 | 0.278 | 0.262 | 0.249 |
|          | DL  | 0.759                  | 0.538 | 0.443 | 0.386 | 0.346 | 0.318 | 0.295 | 0.276 | 0.26  | 0.247 |
|          | JB  | 1.265                  | 0.797 | 0.633 | 0.541 | 0.478 | 0.434 | 0.399 | 0.371 | 0.348 | 0.329 |
|          | HT  | 0.85                   | 0.575 | 0.465 | 0.4   | 0.357 | 0.326 | 0.301 | 0.281 | 0.265 | 0.251 |

New, the new resampling method proposed in this paper; DL, the DerSimonian–Laird method; JB, the Jackson–Bowden method; HT, the Hardy–Thompson method.
